# Supplementary material for: Highly sensitive AuNSs@AgNR SERS substrates for rapid determination of aromatic amines
Source: Royal Society of Chemistry journal article supplement (doi:10.1039/d2an01817a), 2023-01-01
Supplement: d2an01817a1.pdf [file d2an01817a1.pdf]

## Electronic Supplementary Information

# Highly Sensitive AuNSs@AgNR SERS Substrates for Rapid Determination of Aromatic Amines

Qian Zhang,<sup>a</sup> Zhenglin Liu,<sup>a</sup> Hengchang Zhang,<sup>a</sup> Caiqin Han,<sup>a</sup> Ying Wu,<sup>a</sup> Changchun  
Yan,<sup>a</sup> Ying Liu,<sup>a</sup> Bin Wu,<sup>\*b</sup> Guohai Yang,<sup>\*c</sup> Peitong Duan<sup>\*a,d</sup>

<sup>a</sup>. Jiangsu Key Laboratory of Advanced Laser Materials and Devices, School of Physics and Electronic Engineering, Jiangsu Normal University, Xuzhou 221116, China.

<sup>b</sup>. The 41st Institute of China Electronics Technology Group Corporation, Qingdao 266555, China.

<sup>c</sup>. School of Chemistry and Materials Science, Jiangsu Normal University, Xuzhou 221116, China.

<sup>d</sup>. National University Science Park, Jiangsu Normal University, Xuzhou 221009, China.

\* Corresponding author, E-mail: a. dpthcq@jsnu.edu.cn; b. wubin@ei41.com; c. yangguohai@jsnu.edu.cn

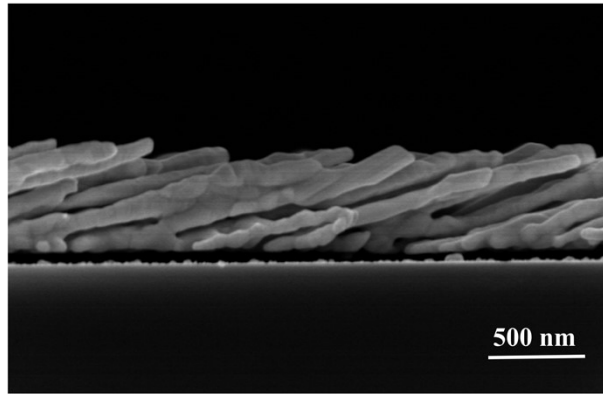

**Fig. S1.** Cross-sectional view of the AgNR substrate.

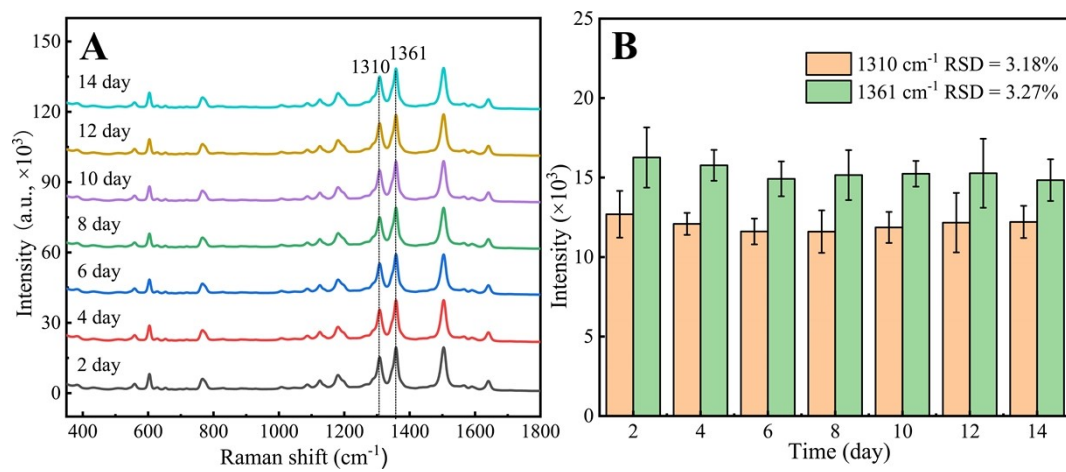

**Fig. S2.** (A) SERS spectra of R6G collected from AuNSs@AgNR substrate sealed for two weeks; (B) histogram of peak intensity and storage time at  $1310 \text{ cm}^{-1}$  and  $1361 \text{ cm}^{-1}$ .

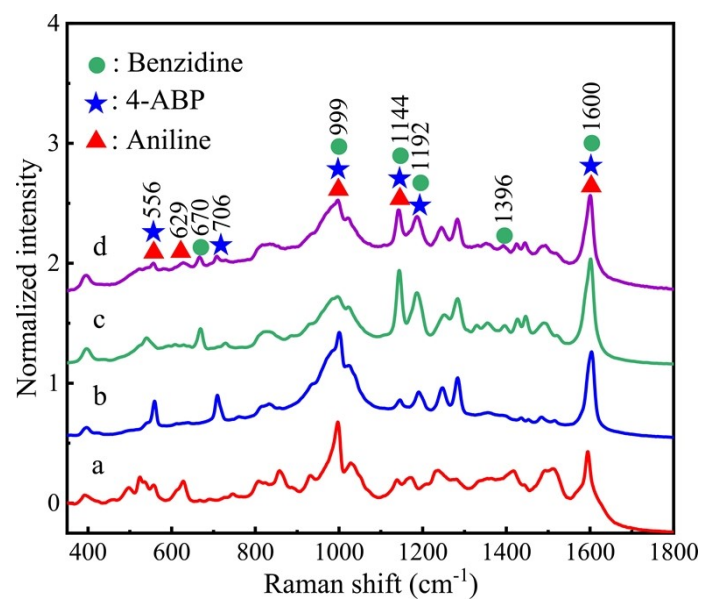

**Fig. S3.** SERS spectra of (a) aniline, (b) 4-ABP, (c) benzidine, (d) mixture of aniline, 4-ABP and benzidine. All spectra were normalized by the highest peak in each spectrum.

**Table S1.** Comparison of EFs based on R6G and CV for different nanomaterials.

| Probe Molecule | SERS Substrate                                                           | EF                  | Ref.      |
|----------------|--------------------------------------------------------------------------|---------------------|-----------|
| R6G            | Au nanodendrites on tape                                                 | $1 \times 10^8$     | 1         |
|                | Rough gold nanoarrays                                                    | $1.9 \times 10^7$   | 2         |
|                | HS- $\beta$ -CD modified silver nanorods                                 | $3.2 \times 10^7$   | 3         |
|                | Urchin-like Ag hemispheres decorated with Ag nanoparticles               | $1.23 \times 10^6$  | 4         |
|                | Ag-nanoplates decorated polyacrylonitrile nanopillar                     | $9.6 \times 10^6$   | 5         |
|                | Urchin-like AuNPs decorated Ag-nanohemisphere nanodot                    | $1.23 \times 10^7$  | 6         |
|                | Graphene oxide embedded hierarchical silver particles and gold nanostars | $2.59 \times 10^7$  | 7         |
|                | Graphene oxide-wrapped flower-like silver particles                      | $3.4 \times 10^5$   | 8         |
|                | $\beta$ -cyclodextrin coated SiO <sub>2</sub> @Au@Ag nanoparticles       | $2.247 \times 10^7$ | 9         |
|                | AuNSs@AgNR                                                               | $4.67 \times 10^8$  | This work |
| CV             | RGO/Au NRs hybrid films                                                  | $1 \times 10^3$     | 10        |
|                | Silver nanocubes                                                         | $3.1 \times 10^5$   | 11        |
|                | 3D silver metallized nanotrenches                                        | $1.7 \times 10^7$   | 12        |
|                | Wafer-scale SERS metallic nanotube arrays                                | $4.21 \times 10^6$  | 13        |
|                | Twin-ZnSe nanowires                                                      | $3.02 \times 10^5$  | 14        |
|                | Silver nanoparticles arrays                                              | $1 \times 10^7$     | 15        |
|                | Au nano-islands@Ag-frustum arrays                                        | $2.67 \times 10^7$  | 16        |
|                | AuNSs@AgNR                                                               | $1.11 \times 10^8$  | This work |

### Text S1.

#### Calculation of the Enhancement Factors (EFs) of AuNSs@AgNR substrates for R6G and CV.

The EFs of AuNSs@AgNR substrates to R6G and CV are calculated by the following formulas:

$$EF = \left( \frac{I_{SERS}}{I_{Raman}} \right) \times \left( \frac{N_{Raman}}{N_{SERS}} \right) \quad (1)$$

$$N_{SERS} = C_{SERS} V_{SERS} \times \frac{S_{Laser}}{S_{SERS}} \times N_A \quad (2)$$

$$N_{Raman} = C_{Raman} V_{Laser} \times N_A \quad (3)$$

$I_{SERS}$  and  $I_{Raman}$  are the SERS and Raman peak intensity of R6G at 1361  $\text{cm}^{-1}$  and CV at 1177  $\text{cm}^{-1}$ .  $N_{Raman}$  and  $N_{SERS}$  are the quantity of molecules generating Raman signal and SERS signal collected under the light spot.  $C_{Raman} = 10^{-2}$  M,  $C_{SERS} = 10^{-5}$  M were selected of R6G and CV.  $S_{SERS}$  is the dispersion area of the liquid to be measured on the AuNSs@AgNR substrate. In the experiment,  $V_{SERS} = 2$   $\mu\text{L}$  is R6G and CV solution volume, and  $S_{SERS} = \pi r^2 = 3.1 \times 10^{-6}$   $\text{m}^2$  is the actual distribution area of droplets.  $S_{Laser} = \pi r^2 = 7.6 \times 10^{-12}$   $\text{m}^2$  is spot irradiation area on the structure,  $N_A$  is the Avogadro constant.  $V_{Laser} = 2.5 \times 10^{-12}$   $\text{m}^3$  is the volume of solution irradiated in the liquid pool. Finally, the EFs of AuNSs@AgNR substrates for R6G and CV were calculated to be  $4.67 \times 10^8$  and  $1.11 \times 10^8$ , respectively.

## Text S2.

### Calculation of the Enhancement Factors (EFs) of AuNSs@AgNR substrates for benzidine and 4-ABP.

The EFs of AuNSs@AgNR substrates to benzidine and 4-ABP are calculated by the following formulas:

$$EF = \left( \frac{I_{SERS}}{I_{Raman}} \right) \times \left( \frac{N_{Raman}}{N_{SERS}} \right) \quad (1)$$

$$N_{SERS} = C_{SERS} V_{SERS} \times \frac{S_{Laser}}{S_{SERS}} \times N_A \quad (2)$$

$$N_{Raman} = C_{Raman} V_{Laser} \times N_A \quad (3)$$

$I_{SERS}$  and  $I_{Raman}$  are the SERS and Raman peak intensity of benzidine at 1600  $\text{cm}^{-1}$  and 4-ABP at 556  $\text{cm}^{-1}$ .  $N_{Raman}$  and  $N_{SERS}$  are the quantity of molecules generating Raman signal and SERS signal collected under the light spot.  $C_{Raman} = 10^{-2}$  M,  $C_{SERS} = 10^{-5}$  M were selected of benzidine and 4-ABP.  $S_{SERS}$  is the dispersion area of the liquid to be measured on the AuNSs@AgNR substrate. In the experiment,  $V_{SERS} = 2$   $\mu\text{L}$  is benzidine and 4-ABP solution volume, and  $S_{SERS} = \pi r^2 = 3.1 \times 10^{-6}$   $\text{m}^2$  is the actual distribution area of droplets.  $S_{Laser} = \pi r^2 =$

$7.6 \times 10^{-12} \text{ m}^2$  is spot irradiation area on the structure,  $N_A$  is the Avogadro constant.  $V_{\text{Laser}} = 2.5 \times 10^{-12} \text{ m}^3$  is the volume of solution irradiated in the liquid pool. Finally, the EFs of AuNSs@AgNR substrates for benzidine and 4-ABP were calculated to be  $7.38 \times 10^6$  and  $1.90 \times 10^7$ , respectively.

## References:

1. X. C. He, S. J. Yang, T. L. Xu, Y. C. Song and X. J. Zhang, *Biosens Bioelectron*, 2020, **152**, 112013.
2. C. H. Zhu, Q. S. Zhao, D. X. Huo, X. Y. Hu and X. J. Wang, *Mater Chem Phys*, 2021, **263**, 124388.
3. K. X. Sun, G. W. Meng, Q. Huang, X. L. Zhao, C. H. Zhu, Z. L. Huang, Y. W. Qian, X. J. Wang and X. Y. Hu, *J Mater Chem C*, 2013, **1**, 5015-5022.
4. H. B. Tang, G. W. Meng, Z. B. Li, C. H. Zhu, Z. L. Huang, Z. M. Wang and F. D. Li, *Nano Res*, 2015, **8**, 2261-2270.
5. Z. B. Li, Z. F. Du, K. X. Sun, X. He and B. S. Chen, *Rsc Adv*, 2017, **7**, 53157-53163.
6. H. B. Tang, G. W. Meng, Q. Huang, C. H. Zhu, Z. L. Huang, Z. B. Li, Z. Zhanga and Y. Zhang, *Rsc Adv*, 2014, **4**, 19654-19657.
7. C. Y. Zhang, B. C. Zhao, R. Hao, Z. Wang, Y. W. Hao, B. Zhao and Y. Q. Liu, *J Hazard Mater*, 2020, **385**, 121510.
8. C. Y. Zhang, R. Hao, B. Zhao, Y. Z. Fu, H. J. Zhang, S. Moeendarbari, C. S. Pickering, Y. W. Hao and Y. Q. Liu, *Appl Surf Sci*, 2017, **400**, 49-56.
9. Y. L. Lu, G. H. Yao, K. X. Sun and Q. Huang, *Phys Chem Chem Phys*, 2015, **17**, 21149-21157.
10. P. B. Jimenez-Vara, J. Johnny, I. C. Novoa-de Leon, C. Guerrero-Bermea, D. F. Garcia-Gutierrez, D. I. Garcia-Gutierrez, L. Chavez-Guerrero and S. Sepulveda-Guzman, *Mater Lett*, 2020, **265**, 127405.
11. L. Liu, Y. Z. Wu, N. Q. Yin, H. M. Zhang and H. Ma, *J Quant Spectrosc Ra*, 2020, **240**, 106682.
12. A. Colnita, D. Marconi, N. E. Dina, I. Brezestean, D. Bogdan and I. Turcu,

- Spectrochim Acta A*, 2022, **276**, 121232.
13. Y. C. Lu, W. H. Chiang, C. Y. Liu, J. P. Chu, H. C. Ho and C. H. Hsueh, *Sensor Actuat B-Chem*, 2021, **329**, 129132.
  14. G. T. Wang, H. N. Wei, Y. Tian, M. M. Wu, Q. Q. Sun, Z. S. Peng, L. F. Sun and M. Liu, *Opt Express*, 2020, **28**, 18843-18858.
  15. S. Augustine, K. P. Sooraj, V. Pachchigar, C. M. Krishna and M. Ranjan, *Appl Surf Sci*, 2021, **544**, 148878.
  16. M. Y. Li, J. Wu, C. N. Wang and J. H. Fang, *Vacuum*, 2020, **175**, 109265.
